# Supplementary material for: Tissue Response to Subcutaneously Implanted Recombinant Spider Silk: An in Vivo Study
Source: Materials (Basel). 2009 Nov 20;2(4):1908–22. doi: 10.3390/ma2041908 (PMC5513568; doi:10.3390/ma2041908)
Supplement: Supplementary file 1 [file materials-02-01908-s001.pdf]

## Tissue Response to Subcutaneously Implanted Recombinant Spider Silk: An *in Vivo* Study

Camilla Fredriksson <sup>1,2</sup>, My Hedhammar <sup>3</sup>, Ricardo Feinstein <sup>4</sup>, Kerstin Nordling <sup>3</sup>,  
Gunnar Kratz <sup>5</sup>, Jan Johansson <sup>3</sup>, Fredrik Huss <sup>5</sup> and Anna Rising <sup>3,\*</sup>

**Table 1.** Weights (in grams) of animals included in the study. The individual animals (1-3) are listed to the left. Day 1 corresponds to the time of arrival, day 7 to the time of implantation (start of study) and day 14 to the day of explantation (end of study).

| Animal | Day 1 (g) | Day 3 (g) | Day 5 (g) | Day 7 (g) | Day 9 (g) | Day 11 (g) | Day 14 (g) |
|--------|-----------|-----------|-----------|-----------|-----------|------------|------------|
| 1      | 143       | 151       | 158       | 159       | 180       | 200        | 201        |
| 2      | 148       | 165       | 175       | 182       | 234       | 257        | 258        |
| 3      | 154       | 168       | 177       | 184       | 228       | 253        | 259        |
